# Supplementary material for: Co‐occurrence of BAP1 and SF3B1 mutations in uveal melanoma induces cellular senescence
Source: PubMed Central journal article supplement (PMC8807356; doi:10.1002/1878-0261.13128), 2021-11-12

**Fig.S3****A**

| Cell line | 92.1  | Mel202 | Mel270 | OMM2.2 | OMM2.3 | OMM2.5 | OMM1  | OCM1  | Mel285 | Mel290 |
|-----------|-------|--------|--------|--------|--------|--------|-------|-------|--------|--------|
| GNAQ      | Q209L | Q209L  | Q209P  | Q209P  | Q209P  | Q209P  | WT    | WT    | WT     | WT     |
| GNA11     | WT    | WT     | WT     | WT     | WT     | WT     | Q209L | WT    | WT     | WT     |
| BRAF      | WT    | WT     | WT     | WT     | WT     | WT     | WT    | V600E | WT     | WT     |
| BAP1      | WT    | WT     | WT     | WT     | WT     | WT     | WT    | WT    | WT     | WT     |
| SF3B1     | WT    | R625G  | WT     | WT     | WT     | WT     | WT    | WT    | WT     | WT     |
| EIF1AX    | G6D   | WT     | WT     | WT     | WT     | WT     | WT    | WT    | WT     | WT     |

**B****Mel202 (SF3B1)****92.1 (EIF1AX)**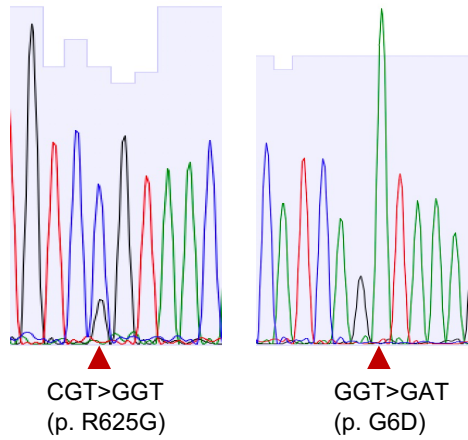**C**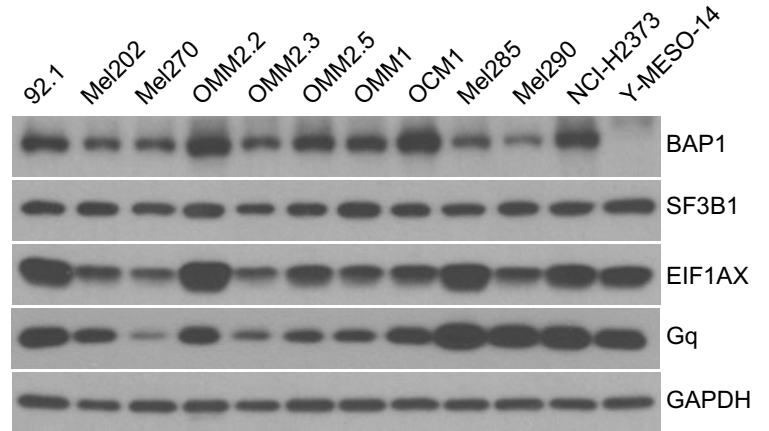

Supplement: MOL2-16-607-s002.pdf [file MOL2-16-607-s002.pdf]
