# Supplementary material for: Co‐occurrence of BAP1 and SF3B1 mutations in uveal melanoma induces cellular senescence
Source: PubMed Central journal article supplement (PMC8807356; doi:10.1002/1878-0261.13128), 2021-11-12
Supplement: MOL2-16-607-s005.pdf [file MOL2-16-607-s005.pdf]

# Fig.S5

A

Mel270 #1

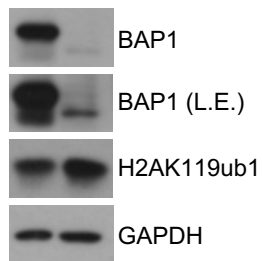

B

Guide RNA (BAP1 g2) 5'-ACCCACCCTGAGTCGCATGA-3'  
Genomic DNA CGTGGACCTGGGACCCACCCTGAGTCGCATGAAGG  
PAM

Mel270 BAP1 KO

KO#1 Allele 1 CGTGGACCTGGGACCCACCCTGAGTCAGCATGAAGG  
Indel  
KO#1 Allele 2 CGTGGACCTGGGACCCACCCTGAGT-2 bp-CATGAAGG  
Indel

OMM2.3 BAP1 KO

KO#1 Allele 1 CGTGGGA-49 bp-CCTGGGACCCACCCTGAGTCGCATGAAGG  
Indel  
KO#1 Allele 2 CGTGGACCTGGGACCCACCCTGTIAGTCGCATGAAGG  
Indel  
KO#2 Allele 1 CGTGGACCTGGGACCCACCCTGAGCTTCGCATGAAGG  
Indel  
KO#2 Allele 2 CGTGGACCTGGGACCCACCCTGAGATCGCATGAAGG  
Indel
