# Supplementary material for: Co‐occurrence of BAP1 and SF3B1 mutations in uveal melanoma induces cellular senescence
Source: PubMed Central journal article supplement (PMC8807356; doi:10.1002/1878-0261.13128), 2021-11-12
Supplement: MOL2-16-607-s009.pdf [file MOL2-16-607-s009.pdf]

**Fig.S18**

**A**

.....

Mel202 (Q209L; R210K)

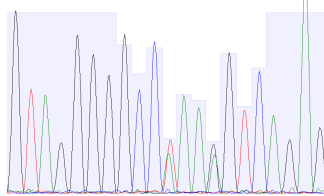

gtagggggccaaaggtcagag  
gtaggggggcctaaagtcagag

**B**

.....

OMM2.3 (Q209P)

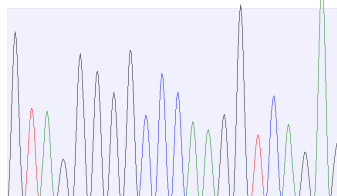

gtagggggcccaaggtcagag

**C**

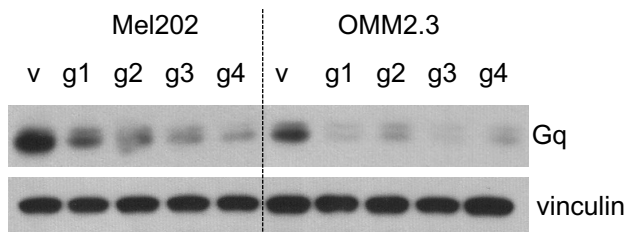

**D**

| Mel202 KO Clone | GNAQ WT allele               | GNAQ Mutant allele |
|-----------------|------------------------------|--------------------|
| #1              | 246 bp indel (49 bp in exon) | 3 bp indel         |
| #2              | 2 bp indel                   | 3 bp indel         |
| #3              | 1 bp indel                   | 3 bp indel         |
| #4              | 4 bp indel                   | Q176K              |
| #5              | 1 bp indel                   | 6 bp indel         |
| #6              | 9 bp indel                   | 9 bp indel         |

**E**

| OMM2.3 KO Clone | gRNA | GNAQ Mutant allele 1 | GNAQ Mutant allele2 | OMM2.3 KO Clone | gRNA | GNAQ Mutant allele 1 | GNAQ Mutant allele2 |
|-----------------|------|----------------------|---------------------|-----------------|------|----------------------|---------------------|
| #1              | g1   | No editing           | 32 bp indel         | #17             | g2   | 1 bp indel           | 6 bp indel          |
| #2              | g1   | No editing           | 6 bp indel          | #18             | g3   | No editing           | 27 bp indel         |
| #3              | g1   | No editing           | 1 bp indel          | #19             | g3   | No editing           | 8 bp indel          |
| #4              | g1   | No editing           | 16 bp indel         | #20             | g3   | No editing           | 8 bp indel          |
| #5              | g1   | No editing           | 21 bp indel         | #21             | g3   | No editing           | 35 bp indel         |
| #6              | g1   | No editing           | 1 bp indel          | #22             | g3   | No editing           | 10 bp indel         |
| #7              | g1   | No editing           | 4 bp indel          | #23             | g3   | No editing           | 8 bp indel          |
| #8              | g2   | 10 bp indel          | 6 bp indel          | #24             | g3   | No editing           | 8 bp indel          |
| #9              | g2   | 4 bp indel           | 6 bp indel          | #25             | g3   | No editing           | 8 bp indel          |
| #10             | g2   | 1 bp indel           | 6 bp indel          | #26             | g4   | No editing           | 1 bp indel          |
| #11             | g2   | 11 bp indel          | 6 bp indel          | #27             | g4   | No editing           | 1 bp indel          |
| #12             | g2   | 6 bp indel           | 6 bp indel          | #28             | g4   | No editing           | 34 bp indel         |
| #13             | g2   | 2 bp indel           | 6 bp indel          | #29             | g4   | No editing           | 1 bp indel          |
| #14             | g2   | 2 bp indel           | 6 bp indel          | #30             | g4   | No editing           | 11 bp indel         |
| #15             | g2   | Not editing          | 9 bp indel          | #31             | g4   | No editing           | 1 bp indel          |
| #16             | g2   | 1 bp indel           | 6 bp indel          | #32             | g4   | No editing           | 37 bp indel         |
