# Supplementary material for: Co‐occurrence of BAP1 and SF3B1 mutations in uveal melanoma induces cellular senescence
Source: PubMed Central journal article supplement (PMC8807356; doi:10.1002/1878-0261.13128), 2021-11-12
Supplement: MOL2-16-607-s010.pdf [file MOL2-16-607-s010.pdf]

## Fig.S8

Guide RNA (TP53 g1) 5'-CCATTGTTCAATATCGTCCG-3'  
Genomic DNA GGGTCTTCAGTGAACCATTGTTCAATATCGTCCGGGGACA  
PAM

### Mel202 p53 KO

KO#1 Allele 1 GGGTCTTCAGTGAACCATTGTTCAATATCGTITCCGGGGACA  
Indel

KO#1 Allele 2 GGGTCTTCAGTGAACCATTGTTCAATATCGTITCCGGGGACA  
Indel

KO#2 Allele 1 GGGTCTTCAGTGAACCATTGTTCAATATCGTITCCGGGGACA  
Indel

KO#2 Allele 2 GGGTCTTCAGTGAACCATTGTTCAATATCGTCCGGGGACA  
GCATCAAATCATCCATTGCTTGGGACGGCAAGGGGGACTGTAGATGGGTG  
78 bp deletion
