# Supplementary material for: Co‐occurrence of BAP1 and SF3B1 mutations in uveal melanoma induces cellular senescence
Source: PubMed Central journal article supplement (PMC8807356; doi:10.1002/1878-0261.13128), 2021-11-12

**Fig.S6****A**

Guide RNA (SF3B1 g1) 5'-AAGATCGCCAAGACTCACGA-3'  
 Genomic DNA ATGGCGAAGATCGCCAAGACTCACGAAGGTAA  
 PAM

Mel202 SF3B1 mut-KO  
 Mutant allele ATGGCGAAGATCGCCAAGACTC-1 bp-CGAAGGTAA  
 Indel

Wild-type allele ATGGCGAAGATCGCCAAGACTCA-3 bp-AGGTAA  
 Indel  
 p.His8\_Glu9delinsGln

**C**

| Mel202 KO Clone | SF3B1 WT allele         | SF3B1 Mutant allele |
|-----------------|-------------------------|---------------------|
| SF3B1 mut-KO    | 3 bp indel              | 1 bp indel          |
| #1              | 6 bp indel              | 1 bp indel          |
| #2              | Missense mutation (H8P) | 1 bp indel          |
| #3              | 6 bp indel              | 1 bp indel          |
| #4              | 3 bp indel              | 1 bp indel          |
| #5              | 6 bp indel              | 6 bp indel          |

**B**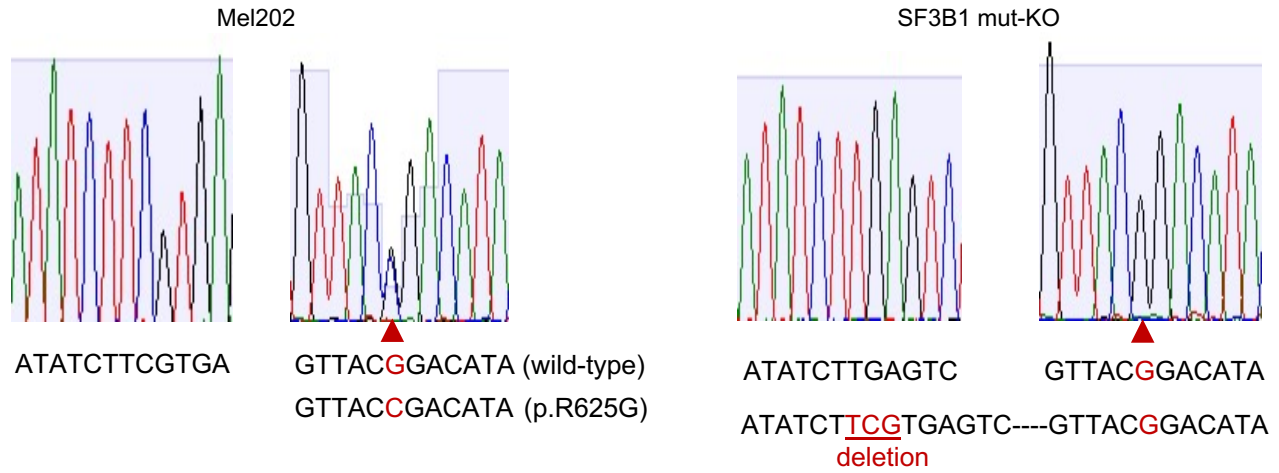**D**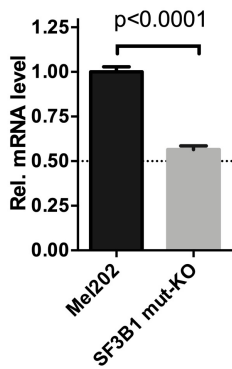**E**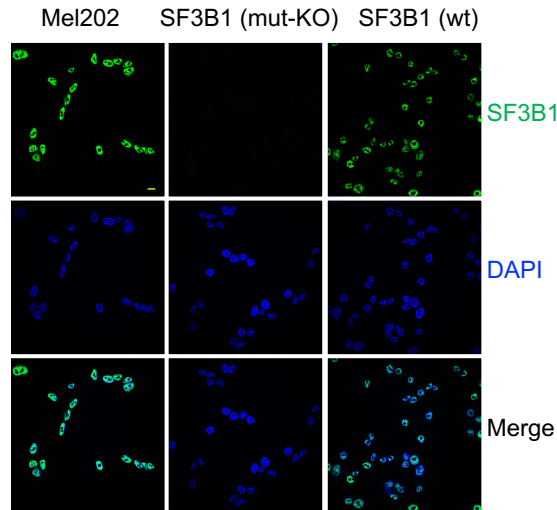

Supplement: MOL2-16-607-s012.pdf [file MOL2-16-607-s012.pdf]
