# Supplementary material for: Co‐occurrence of BAP1 and SF3B1 mutations in uveal melanoma induces cellular senescence
Source: PubMed Central journal article supplement (PMC8807356; doi:10.1002/1878-0261.13128), 2021-11-12

**Fig.S14****A**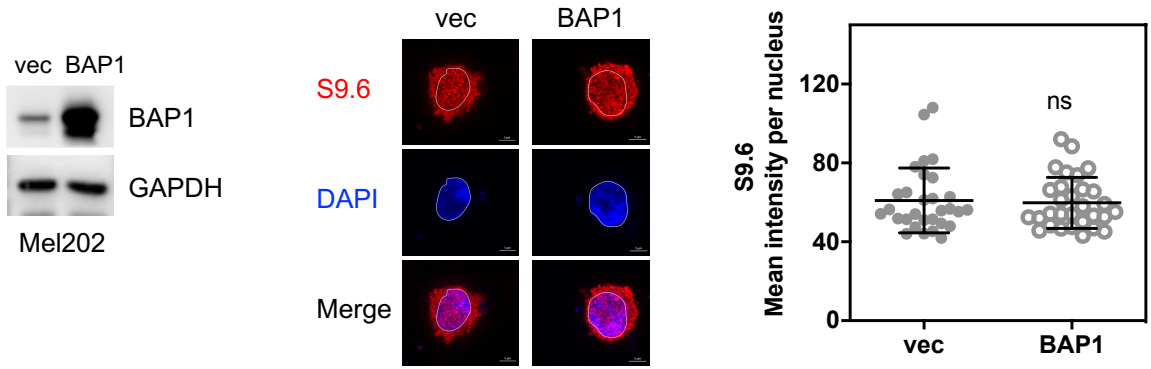**B**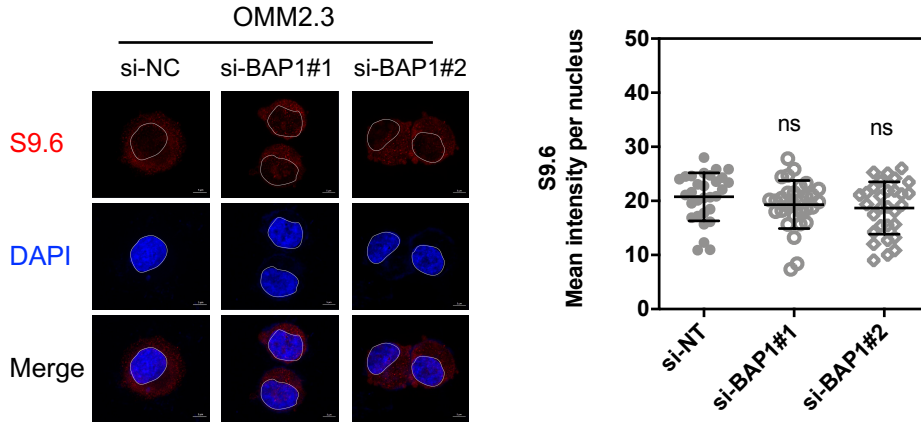**C**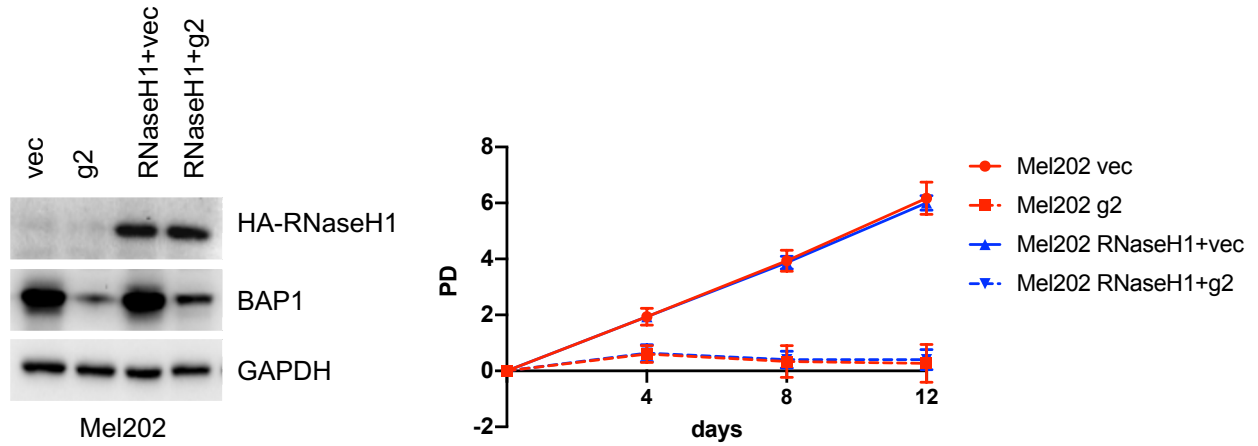

Supplement: MOL2-16-607-s018.pdf [file MOL2-16-607-s018.pdf]
