# Supplementary material for: Co‐occurrence of BAP1 and SF3B1 mutations in uveal melanoma induces cellular senescence
Source: PubMed Central journal article supplement (PMC8807356; doi:10.1002/1878-0261.13128), 2021-11-12
Supplement: MOL2-16-607-s020.pdf [file MOL2-16-607-s020.pdf]

**Fig.S12**

**A**

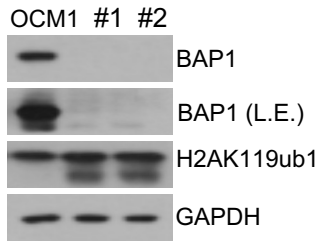

**C**

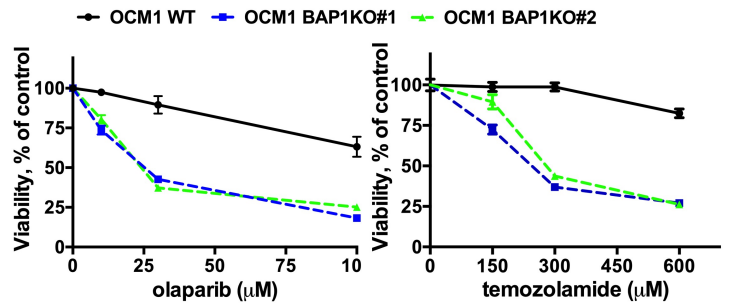

**B**

Guide RNA (BAP1 g2) 5'-ACCCACCCTGAGTCGCATGA-3'

Genomic DNA CGTGGACCTGGGACCCACCCTGAGTCGCATGAAGGACTTCACCAAGGGTT  
PAM

OCM1

KO#1 Allele 1 CGTGGACCTGGGACC-----26 bp-----CCAAGGGTT  
Indel

KO#1 Allele 2 CGTGGACCTGGGACCCACCCTGAGTCGACATGAAGGACTTCACCAAGGGTT  
Indel

KO#2 Allele 1 CGTGGACCTGGGACCCACCCTGAGTCGCATGAAGGACTTCACCAAGGGTT  
Indel

KO#2 Allele 2 CGTGGACCTGGGACCCACCCTGAGTCGCATGAAGGACTTCACCAAGGGTT  
Indel
